# Supplementary material for: Preparation of rare-earth doped NaYF4 luminescent nanoparticles by a high-energy ball milling process
Source: Royal Society of Chemistry journal article supplement (doi:10.1039/d3ce00642e), 2023-01-01
Supplement: d3ce00642e1.pdf [file d3ce00642e1.pdf]

## Preparation of rare-earth doped NaYF<sub>4</sub> luminescent nanoparticles by high-energy ball milling process

### Electronic Supplementary Information

Aleksandr V. Koshelev<sup>\*a</sup>, Vadim V. Grebenev<sup>a</sup>, Natalia A. Arkharova<sup>a</sup>,  
Andrey A. Shiryayev<sup>b</sup>, Denis N. Karimov<sup>\*a</sup>

<sup>a</sup>FSRC “Crystallography and Photonics” of Russian Academy of Sciences, 59,  
Leninskiy Prospekt, Moscow, 119333, Russia.

<sup>b</sup>Institute of Physical Chemistry and Electrochemistry of Russian Academy of  
Sciences, 31, Leninskiy Prospekt, Moscow, 119071, Russia

e-mail: avkoshelev03@gmail.com (A.V. Koshelev)

dnkarimov@gmail.com (D.N. Karimov)

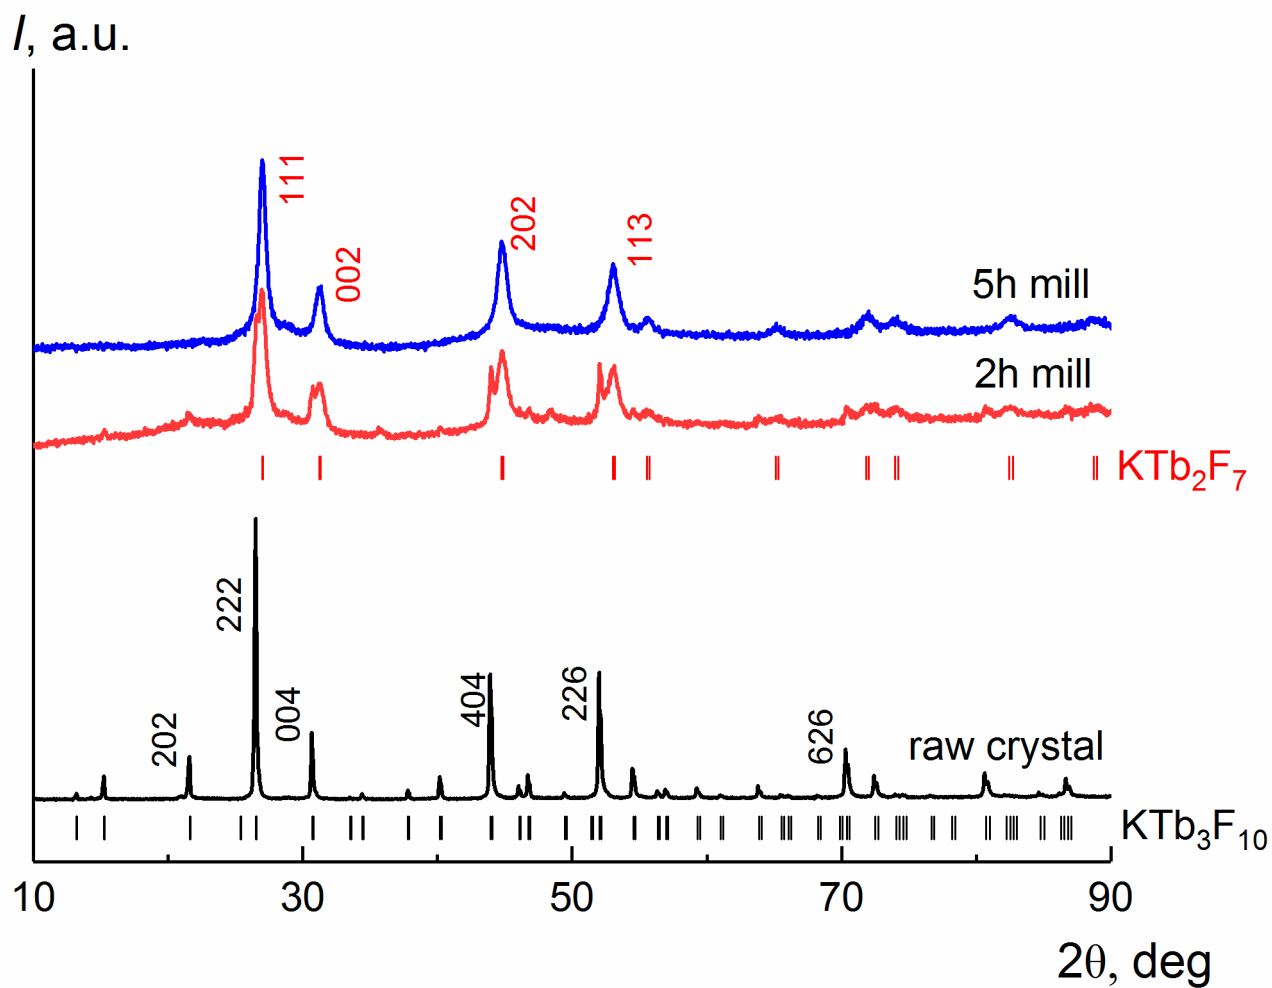

**Figure S1** XRD patterns  $\text{KTb}_3\text{F}_{10}$  crystal after different “wet” mechanical milling treatment; the positions of the Bragg peaks for the  $\text{KTb}_3\text{F}_{10}$  (ICDD PDF 01-074-2165, sp. gr.  $Fm\bar{3}m$ ) and  $\text{KTb}_2\text{F}_7$  (ICDD PDF 00-057-0574, sp. gr.  $Fm\bar{3}m$ ) are indicated.

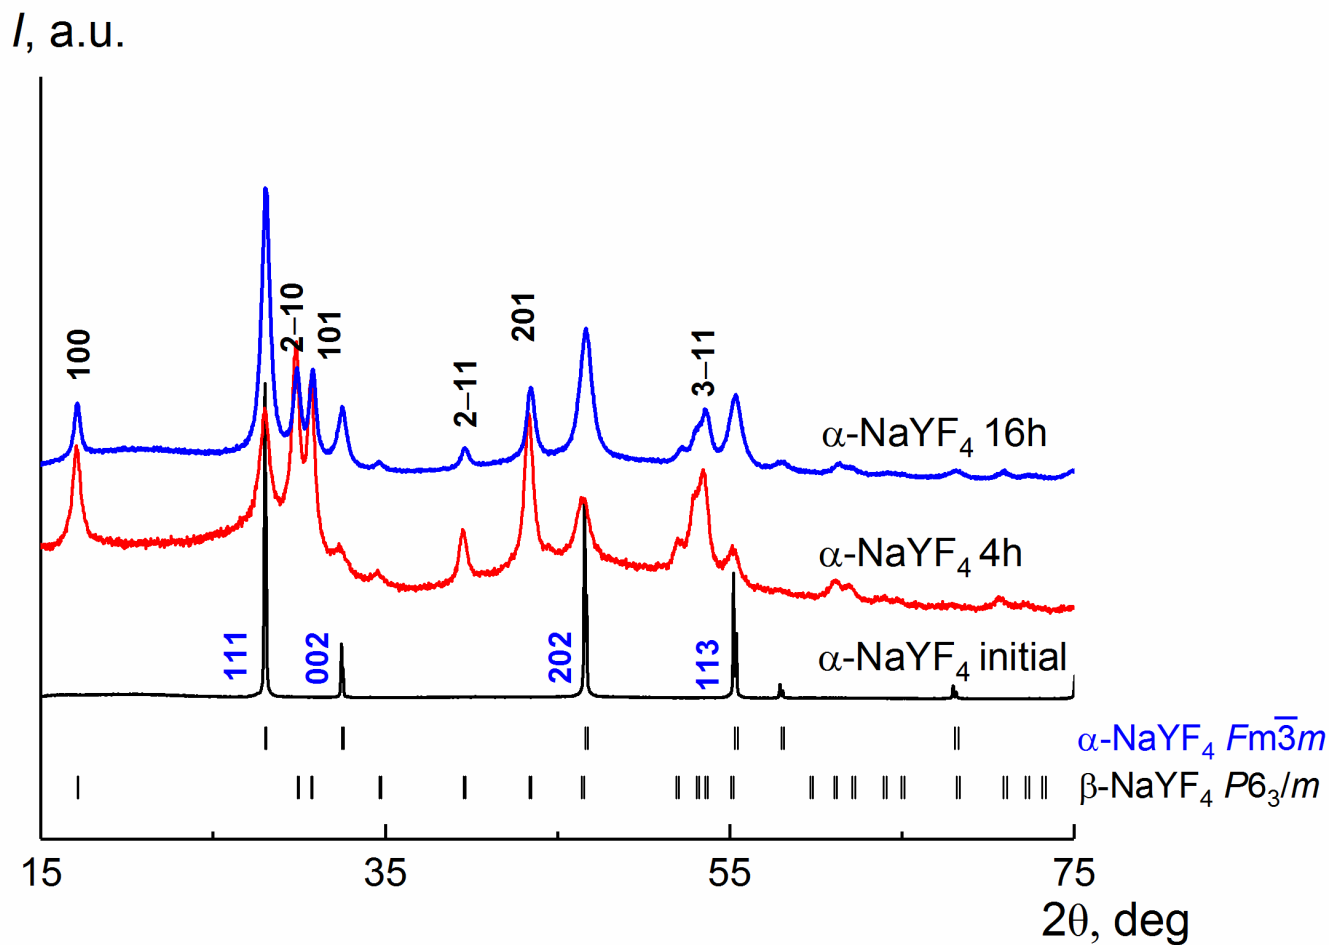

**Figure S2** XRD patterns of the “wet” milled  $\alpha$ - $\text{NaYF}_4$  crystals at different duration of mechanical treatment. The positions of the Bragg peaks for sp. gr.  $Fm\bar{3}m$  (ICDD PDF 01-077-2042) and  $P6_3/m$  (ICDD PDF 00-064-0156) are indicated.

## FTIR analysis

FTIR spectra of the oleic acid, «dry»-milled  $\beta$ -NaYF<sub>4</sub> and oleate-capped 16 h-milled  $\beta$ -NaYF<sub>4</sub> NPs were measured on a Bruker Alpha FTIR spectrometer using the KBr method. The spectra in transmission mode were recorded in a wavenumber range of 4000-500 cm<sup>-1</sup>.

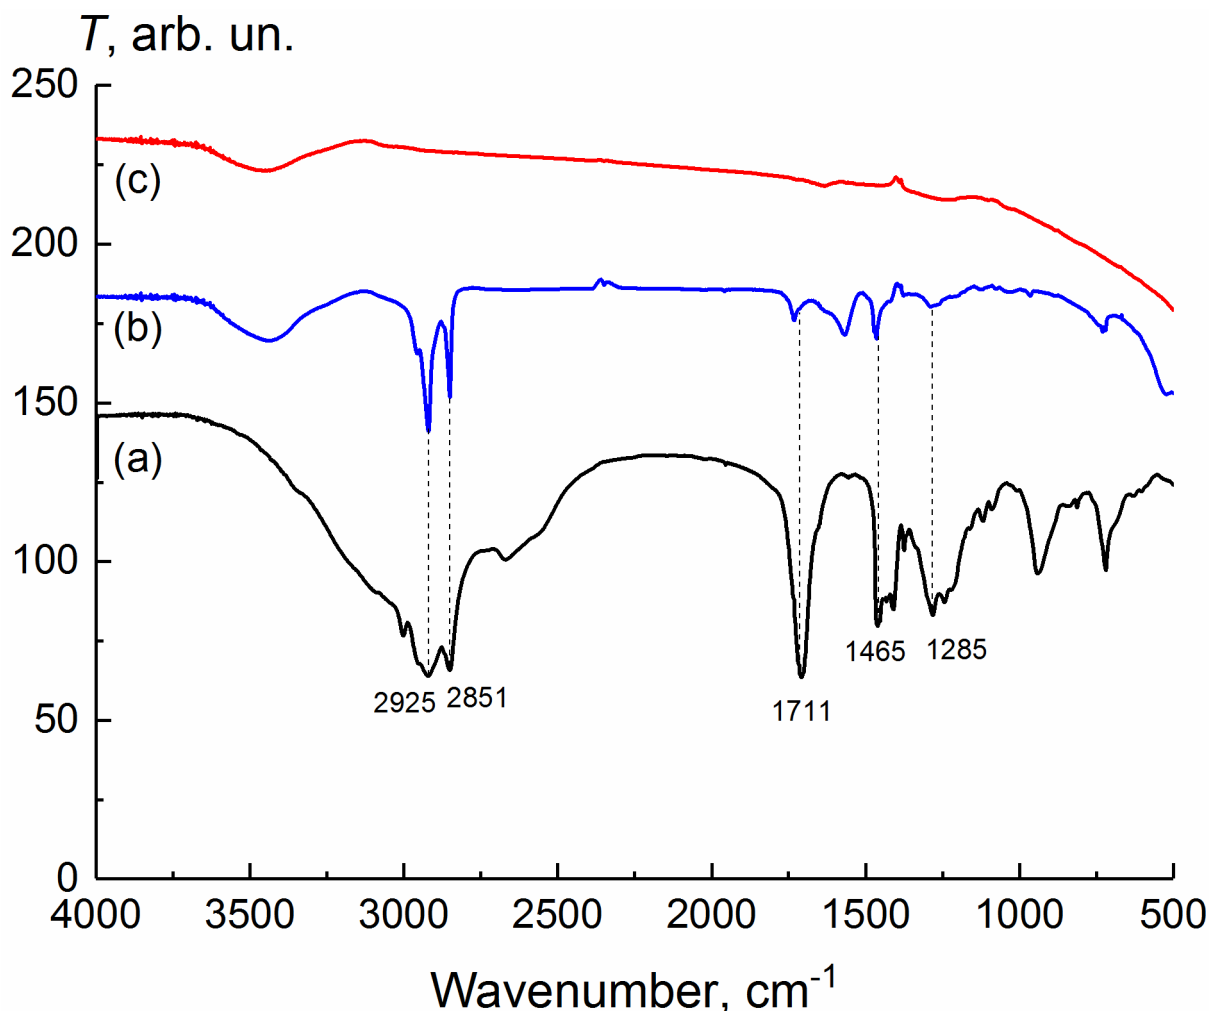

**Figure S3.** FTIR spectra of (a) pure oleic acid, (b)  $\beta$ -NaYF<sub>4</sub> NPs, produced *via* 16 h oleate-mediated milling, and (c) «dry»-milled (oleate-free)  $\beta$ -NaYF<sub>4</sub> NPs.

The signals, observed for pure oleic acid, are corresponded to the characteristic vibrations of various functional groups:  $\text{-CH}_{\text{val}}$  and  $\text{-COO-H}_{\text{val}}$  (3150-2800 cm<sup>-1</sup>),  $\text{-C=O}$  (1711 cm<sup>-1</sup>),  $\text{-CH}_{\text{def}}$  and  $\text{-COO}_{\text{def}}$  (1480-1400 cm<sup>-1</sup>). In the FTIR spectrum of  $\beta$ -NaYF<sub>4</sub> NPs, fabricated by 16 h oleate-mediated milling, analogous peaks are observed, confirming the functionalization of the NPs surface by oleic acid molecules.
